# Supplementary material for: Uranium adsorption from sulfuric acid media using silica materials functionalised with amide and phosphorous ligands
Source: Royal Society of Chemistry journal article supplement (doi:10.1039/c8nj02601g), 2018-01-01
Supplement: c8nj02601g1.pdf [file c8nj02601g1.pdf]

## ELECTRONIC SUPPLEMENTARY INFORMATION

### Paper : "Uranium adsorption from sulfuric acid media using silica materials functionalised with amide and phosphorous ligands

Tom Le Nedelec,<sup>a,b</sup> Alexandre Charlot,<sup>a,b</sup> François Calard,<sup>a</sup> Antoine Leydier,<sup>a</sup> Frédéric Cueur<sup>b</sup> and Agnès Grandjean<sup>\*a</sup>

#### Ligand synthesis

##### APO

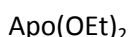

In a round-bottomed flask was charged Triethyl 2-phosphonopropionate (10g), NaOH in excess (4g) with EtOH (200ml) and H<sub>2</sub>O (50ml). The reaction mixture was stirred overnight, concentrated, acidified with 50ml HCl 1M, extracted twice with ethyl acetates, dried over MgSO<sub>4</sub>, filtered. Solvent removal yielded 5.7g of pure diethyl 2-phosphonopropionic acid as green oil.

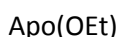

In a round-bottomed flask was charged Triethyl 2-phosphonopropionate (4,5g), NaOH in excess (3,6g) with EtOH (200ml) and H<sub>2</sub>O (50ml). The reaction mixture was refluxed for 48h, concentrated, acidified with 50ml HCl 1M, extracted twice with ethyl acetates, dried over MgSO<sub>4</sub>, filtered. Solvent removal yielded 2.8g of pure ethyl 2-phosphonopropionic acid as brown viscous oil.

##### diAPo

Compounds **4a1**, **4c1** and **7c1** were directly purchased from SpecificPolymers and used without further purification:

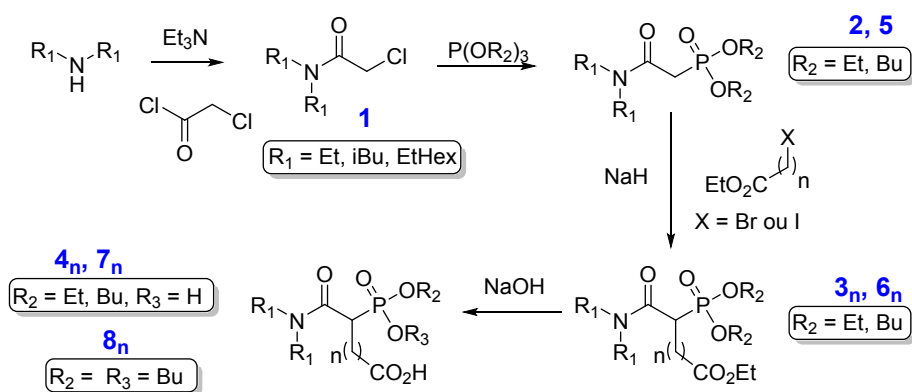

#### DiAPo@silica precursor synthesis

##### General procedure for the synthesis of compounds 1

2-chloroacetyl chloride (8.25g, 70 mmol, 1 éq.) is introduced in a 1L round bottom flask with 200 mL Et<sub>2</sub>O. Di-alkyl-amine (R<sub>1</sub>)<sub>2</sub>NH (70 mmol, 1 éq) and triethylamine (8.03, 80 mmol, 1.12 eq) are diluted into 30 mL of diethyl ether and then added dropwise under heavy stirring. The mixture is allowed to stir overnight, filtered, evaporated to dryness. The residue was purified by flash chromatography (SiO<sub>2</sub>) (Cyclohexane, Et<sub>2</sub>O).

### Compound 1a

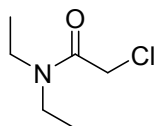

$^1\text{H}$  NMR ( $\text{CDCl}_3$ , 400 MHz, 25°C)  $\delta$  (ppm): 4.0 (s, 2H, OC- $\text{CH}_2$ -Cl), 3.4-3.3 (m, 4H, N- $\text{CH}_2$ - $\text{CH}_3$ ), 1.2-1.0 (m, 6H, N- $\text{CH}_2$ - $\text{CH}_3$ )

$^{13}\text{C}$  NMR ( $\text{CDCl}_3$ , 100 MHz, 25°C)  $\delta$  (ppm): 165.4 (O-C- $\text{CH}_2$ ), 42.2 ( $\text{CH}_2$ ), 41.0 ( $\text{CH}_2$ ), 40.3 ( $\text{CH}_2$ ), 14.0 ( $\text{CH}_3$ ), 12.4 ( $\text{CH}_3$ )

Yield: 70%

### Compound 1b

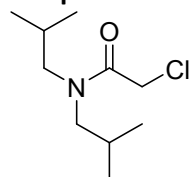

$^1\text{H}$  NMR ( $\text{CDCl}_3$ , 400 MHz, 25°C)  $\delta$  (ppm): 4.1 (s, 2H, OC- $\text{CH}_2$ -Cl), 3.19-3.17 (d, 2H, N- $\text{CH}_2$ -CH), 3.13-3.11 (d, 2H, N- $\text{CH}_2$ -CH), 2.03-1.86 (m, 2H,  $(\text{CH}_3)_2$ -CH- $\text{CH}_2$ ), 1.93-1.86, 0.92-0.86 (m,  $\text{CH}_3$ -CH)

$^{13}\text{C}$  NMR ( $\text{CDCl}_3$ , 100 MHz, 25°C)  $\delta$  (ppm): 167.6 (O-C- $\text{CH}_2$ ), 56.2 ( $\text{CH}_2$ ), 53.5 ( $\text{CH}_2$ ), 41.9 ( $\text{CH}_2$ ), 28.3 (CH), 26.8 (CH), 20.5 ( $\text{CH}_3$ )

Yield: 86%

### General procedure for the synthesis of compounds 2 and 5

Compound 1 (10 mmol, 1 Eq) and trialkyl phosphite (120 mmol, 12 Eq) are introduced a 250 mL round bottom flask, flushed 15 min with  $\text{N}_2$ . The mixture refluxed overnight under stirring. The mixture is distilled around (110°C for triethyl phosphate, 160°C for tributyl phosphite) to remove the excess of Phosphite. The residue was purified by flash chromatography ( $\text{SiO}_2$ ) (Cyclohexane, EtOAc). and yield the targeted product.

### Compound 5a

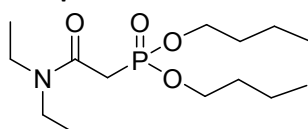

$^{31}\text{P}$  NMR ( $\text{CDCl}_3$ , 162 MHz)  $\delta$  (ppm): 21.4

$^1\text{H}$  NMR ( $\text{CDCl}_3$ , 400 MHz, 25°C)  $\delta$  (ppm): 4.01-3.96 (m, 4H, O- $\text{CH}_2$ - $\text{CH}_2$ ), 3.33-3.25 (m, 4H, N- $\text{CH}_2$ - $\text{CH}_3$ ), 2.93-2.87 (d, 2H,  $J_{\text{H-P}}=22$  Hz, P- $\text{CH}_2$ -CON), 1.73-1.58 (m, 4H, O- $\text{CH}_2$ - $\text{CH}_2$ ), 1.48-1.34 (m, 4H, O-( $\text{CH}_2$ ) $_2$ - $\text{CH}_2$ ), 1.23-1.10 (td, 6 H,  $\text{CH}_3$ - $\text{CH}_2$ -N), 0.96-0.91 (t, 6H, O-( $\text{CH}_2$ ) $_3$ - $\text{CH}_3$ ).

$^{13}\text{C}$  NMR ( $\text{CDCl}_3$ , 100 MHz, 25°C)  $\delta$  (ppm): 164.2 ( $\text{CH}_2$ -C-ON), 67.6 ( $\text{CH}_2$ ), 66.5 ( $\text{CH}_2$ ), 43.3 ( $\text{CH}_2$ ), 40.8 (P- $\text{CH}_2$ -CON), 34.26 ( $\text{CH}_2$ ), 32.8 ( $\text{CH}_2$ ), 14.5 ( $\text{CH}_3$ ), 13.9 ( $\text{CH}_3$ ), 13.2 ( $\text{CH}_3$ )

Yield: 81%

### Compound 5b

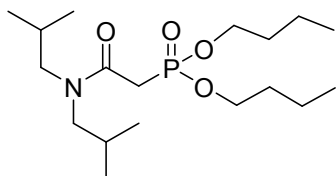

$^{31}\text{P}$  NMR ( $\text{CDCl}_3$ , 162 MHz)  $\delta$  (ppm): 21.8

$^1\text{H}$  NMR ( $\text{CDCl}_3$ , 400 MHz,  $25^\circ\text{C}$ )  $\delta$  (ppm): 4.05-3.99 (q, 4H, O- $\text{CH}_2$ - $\text{CH}_2$ ), 3.01-2.96 (d, 2H,  $J_{\text{H-P}}=22$  Hz, P- $\text{CH}_2$ -CON), 3.14-3.11 (q, 4H, N- $\text{CH}_2$ -CH), 1.96 (m, 1H,  $(\text{CH}_3)_2$ -CH- $\text{CH}_2$ ), 1.84 (m, 1H,  $(\text{CH}_3)_2$ -CH- $\text{CH}_2$ ), 1.62-1.55 (m, 5H), 1.37-1.30 (m, 5H), 0.80-0.81 (m, 18H)

$^{13}\text{C}$  NMR ( $\text{CDCl}_3$ , 100 MHz,  $25^\circ\text{C}$ )  $\delta$  (ppm): 164.7 (s,  $\text{CH}_2$ -C-ON), 65.9 ( $\text{CH}_2$ ), 56.1 ( $\text{CH}_2$ ), 53.1 ( $\text{CH}_2$ ), 33.8 ( $\text{CH}_2$ ), 32.2 ( $\text{CH}_2$ ), 27.6 (CH), 26.3 (CH), 19.8 ( $\text{CH}_3$ -CH- $\text{CH}_3$ ), 18.4 ( $\text{CH}_2$ ), 13.3 ( $\text{CH}_3$ - $\text{CH}_2$ )

Yield: 85%

#### General procedure for the synthesis of compounds 3n and 6n

Compound 2 or 5 (6.5 mmol, 1 Eq) and 40 mL of dry DMF are introduced into a 100 mL three-neck round bottom flask dried under  $\text{N}_2$ . Sodium hydride (7.2 mmol, 1.1 Eq) 60% in grease and the appropriate halogenated reagent RX: X-( $\text{CH}_2$ ) $_n$ - $\text{CO}_2\text{Et}$  (11 mmol, 1.7 Eq) are added. The mixture is allowed to stir overnight under  $\text{N}_2$  for 24h. The residue was concentrated under reduced pressure, resolved into dichloromethane, centrifuged, filtered, then purified by flash chromatography ( $\text{SiO}_2$ ) (Cyclohexane/ $\text{EtOAc}$ ) to yield the desired compound.

#### Compound 6a1

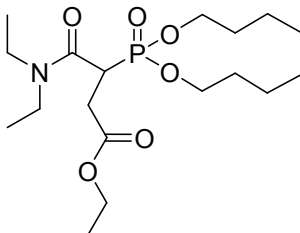

RX: n = 1, X = Br, Ethyl bromoacetate

$^{31}\text{P}$  NMR ( $\text{CDCl}_3$ , 162 MHz)  $\delta$  (ppm): 23.3

$^1\text{H}$  NMR ( $\text{CDCl}_3$ , 400 MHz,  $25^\circ\text{C}$ )  $\delta$  (ppm): 4.18-4.07 (m, 6H,  $\text{OCH}_2$ ), 3.81-3.33 (m, 6H,  $\text{CH}_2$ -CO & N- $\text{CH}_2$ ), 2.77-2.72 (m, 1H, P- $\text{CH}(\text{CH}_2)$ -CO), 1.66-1.54 (m, 4H, N- $\text{CH}_2$ - $\text{CH}_2$ ), 1.41-1.34 (m, 4H,  $\text{CH}_2$ - $\text{CH}_2$ - $\text{CH}_3$ ), 1.33-1.24 (m, 6H, N- $\text{CH}_2$ - $\text{CH}_3$ ), 1.11 (t, 3H, CO-O- $\text{CH}_2$ - $\text{CH}_3$ ), 0.92 (m, 6H,  $\text{CH}_2$ - $\text{CH}_2$ - $\text{CH}_3$ )

Yield: 66%

#### Compound 6b1

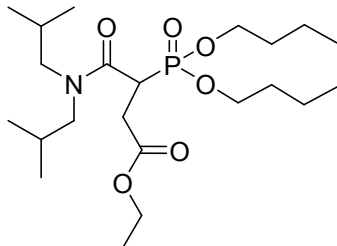

RX: n = 1, X = Br, Ethyl bromoacetate

$^{31}\text{P}$  NMR ( $\text{CDCl}_3$ , 162 MHz)  $\delta$  (ppm): 23.0

$^1\text{H}$  NMR ( $\text{CDCl}_3$ , 400 MHz,  $25^\circ\text{C}$ )  $\delta$  (ppm): 4.11-4.00 (m, 6H,  $\text{OCH}_2$ ), 3.65-3.57 (m, 1H,  $\text{N-CH}_2$ ), 3.23-3.14 (m, 1H,  $\text{N-CH}_2$ ), 3.06-3.00 (m, 1H,  $\text{N-CH}_2$ ), 2.79-2.69 (m, 1H,  $\text{CH-CH}_2$ ), 2.15-2.00 (m, 2H,  $\text{CH-CH}_2\text{-C}$ ), 1.66-1.54 (m, 5H,  $\text{N-CH}_2\text{-CH}$ ), 1.41-1.34 (m, 4H,  $\text{CH}_2\text{-CH}_3$ ), 1.25-1.96 (t, 3H,  $\text{O-CH}_2\text{-CH}_3$ ), 0.96-0.84 (m, 18H,  $\text{CH}_3$ )

$^{13}\text{C}$  NMR ( $\text{CDCl}_3$ , 100 MHz,  $25^\circ\text{C}$ )  $\delta$  (ppm): 171.9 (N-CO), 167.5 (O-CO), 67.1 ( $\text{O-CH}_2$ ), 66.2 ( $\text{O-CH}_2$ ), 61.7 (CO-O- $\text{CH}_2$ ), 56.9 (N- $\text{CH}_2$ ), 55.5 (N- $\text{CH}_2$ ), 37.9 (CO- $\text{CH}_2\text{CH}_2$ ), 32.9-32.7 ( $\text{O-CH}_2\text{-CH}_2$ ), 28.4 ( $\text{CH}_3$ ), 26.9 ( $\text{CH}_3$ ), 20.8 ( $\text{CH}_3$ ), 20.4 ( $\text{CH}_3$ ), 20.3 ( $\text{CH}_3$ ), 18.9 ( $\text{CH}_2$ ), 14.4 ( $\text{CH}_3$ ), 13.8 ( $\text{CH}_3$ )

Yield: 52%

### Compound 6b2

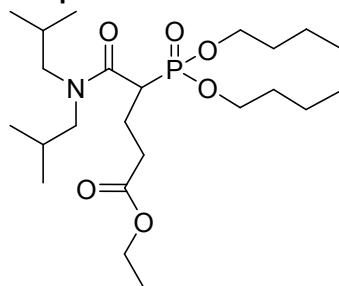

RX:  $n = 2$ ,  $X = \text{I}$ , Ethyl 2-iodopropionate

$^{31}\text{P}$  NMR ( $\text{CDCl}_3$ , 162 MHz)  $\delta$  (ppm): 23.56

$^1\text{H}$  NMR ( $\text{CDCl}_3$ , 400 MHz,  $25^\circ\text{C}$ )  $\delta$  (ppm): 4.08 (m, 4H,  $\text{O-CH}_2$ ), 3.55 (m, 1H,  $\text{OC-CH}_2\text{CH}_2$ ), 3.42-3.37 (m, 2H), 2.95 (m, 1H), 2.77 (m, 1H), 2.26-2.02 (m, 6H), 1.62-1.57 (m, 6H), 1.37-1.36 (m, 3H), 1.24-1.20 (m, 3H), 0.93-0.85 (m, 16H)

Yield: 40%

### Compound 6b3

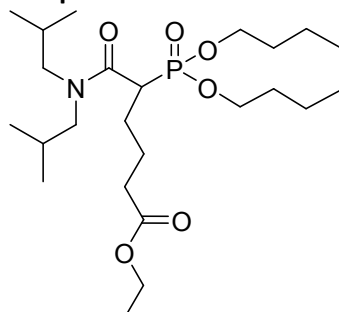

RX:  $n = 3$ ,  $X = \text{I}$ , Ethyl 4-iodobutyrate

$^{31}\text{P}$  NMR ( $\text{CDCl}_3$ , 162 MHz)  $\delta$  (ppm): 23.86

$^1\text{H}$  NMR ( $\text{CDCl}_3$ , 400 MHz,  $25^\circ\text{C}$ )  $\delta$  (ppm): 4.09-4.00 (m, 6H,  $\text{O-CH}_2$ ), 3.61-3.56 (q, 1H), 3.47-3.41 (q, 1H), 3.20 (m, 1H), 2.98-2.92 (q, 1H), 2.82-2.77 (q, 1H), 2.29-2.25 (m, 2H), 2.06-2.02 (m, 2H), 1.91-1.89 (m, 2H), 1.65-1.53 (m, 9H), 1.40-1.32 (m, 6H,  $\text{CH}_2\text{-CH}_2\text{-CH}_3$ ), 1.24-1.19 (t, 3H,  $\text{O-CH}_2\text{-CH}_3$ ), 0.94-0.83 (m, 18H)

Yield: 23%

### Compound 6b4

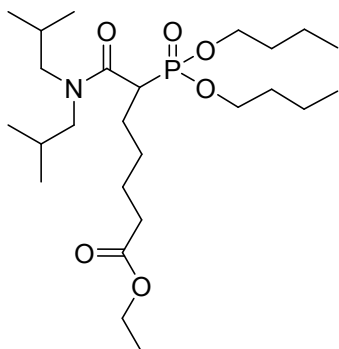

RX: n = 4, X = I, Ethyl 5-iodovalerate

$^{31}\text{P}$  NMR (CDCl<sub>3</sub>, 162 MHz)  $\delta$  (ppm): 24.13

$^1\text{H}$  NMR (CDCl<sub>3</sub>, 400 MHz, 25°C)  $\delta$  (ppm): 4.09-4.01 (m, 6H, O-CH<sub>2</sub>), 3.57-3.54 (m, 1H), 3.43-3.38 (m, 1H), 3.20-3.12 (m, 1H), 2.95-2.90 (m, 1H), 2.94-2.90 (m, 1H), 2.81-2.76 (m, 1H), 2.26-2.23 (m, 2H), 2.07-1.73 (m, 5H), 1.72-1.61 (m, 6H), 1.36-1.35 (m, 6H), 1.23-1.19 (m, 4H), 0.91-0.85 (m, 18H, CH<sub>3</sub>)

$^{13}\text{C}$  NMR (CDCl<sub>3</sub>, 100 MHz, 25°C)  $\delta$  (ppm): 173.7 (CO-N), 168.4 (CO-O), 66.7 (CH<sub>2</sub>), 66.2 (CH<sub>2</sub>), 64.4 (CH<sub>2</sub>), 60.4 (CH<sub>2</sub>), 56.2 (CH<sub>2</sub>), 55.1 (CH<sub>2</sub>), 43.1 (CH), 41.8 (CH), 34.2 (CH<sub>2</sub>), 32.8 (CH<sub>2</sub>), 30.9 (CH<sub>2</sub>), 28.7 (CH), 28.2 (CH<sub>2</sub>), 26.9 (CH), 25.2 (CH<sub>2</sub>), 20.6 (CH<sub>3</sub>), 20.3 (CH<sub>2</sub>), 18.9 (CH<sub>2</sub>), 14.5 (CH<sub>3</sub>), 13.9 (CH<sub>3</sub>)

Yield: 69%

#### General procedure for the synthesis of compounds 4n and 7n

Compound 3n or 6n (2.5 mmol, 1 Eq) is introduced into a 50 mL round bottom flask dried under N<sub>2</sub>, with 10 mL of ethanol, 2ml H<sub>2</sub>O and sodium hydroxide (22.5 mmol, 9 Eq). The mixture is refluxed overnight. The mixture is allowed to room temperature, diluted with 10 mL of ethanol and acidified with 14M HCl to reach pH=1. The residue was concentrated under reduced pressure, resolved into dichloromethane, dried with MgSO<sub>4</sub>, filtered and re-evaporated to yield the desired compound.

#### Compound 4a1

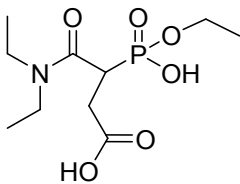

$^{31}\text{P}$  NMR (CDCl<sub>3</sub>, 162 MHz)  $\delta$  (ppm): 22.4

$^1\text{H}$  NMR (CDCl<sub>3</sub>, 400 MHz, 25°C)  $\delta$  (ppm): 4.11 (m, 2H, POCH<sub>2</sub>), 3.62-3.30 (m, 6H, CH<sub>2</sub>-CO & N-CH<sub>2</sub>), 2.85 (m, 1H, P-CH(CH<sub>2</sub>)-CO), 1.28 (m, 6H, N-CH<sub>2</sub>-CH<sub>3</sub>), 1.10 (m, 3H, PO-CH<sub>2</sub>-CH<sub>3</sub>), 0.89 (m, 6H,

#### Compound 4c1

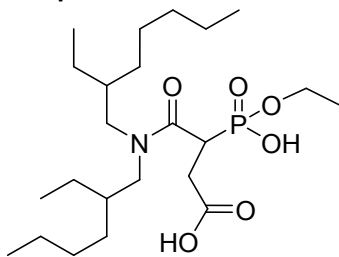

$^{31}\text{P}$  NMR (CDCl<sub>3</sub>, 162 MHz)  $\delta$  (ppm): 23.7

$^1\text{H}$  NMR ( $\text{CDCl}_3$ , 400 MHz,  $25^\circ\text{C}$ )  $\delta$  (ppm): 4.07 – 4.00 (m, 2H, O- $\text{CH}_2$ - $\text{CH}_3$ ), 3.72 – 3.65 (m, 1H,  $\text{CH}_2$ -N) ; 3.48 – 3.09 (m, 5H,  $\text{CH}_2$ -N & CO- $\text{CH}_2$ ), 2.90-2.86(m, 1H, , CO- $\text{CH}$ -P) ; 1.78 – 1.66 (m, 2H,  $\text{CH}$ - $\text{CH}_2$ -N) ; 1.37 – 1.17 (m, 15H,  $\text{CH}_2$  & O- $\text{CH}_2$ - $\text{CH}_3$ ) ; 0.81 – 0.86 (m, 12H,  $\text{CH}_3$ ).

### Compound 7a1

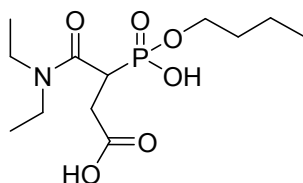

$^{31}\text{P}$  NMR ( $\text{CDCl}_3$ , 162 MHz)  $\delta$  (ppm): 22.9

$^1\text{H}$  NMR ( $\text{CDCl}_3$ , 400 MHz,  $25^\circ\text{C}$ )  $\delta$  (ppm): 3.90 (m, 2H, PO $\text{CH}_2$ ), 3.52-3.01 (m, 6H,  $\text{CH}_2$ -CO & N- $\text{CH}_2$ ), 2.77 (broad s, 1H, P- $\text{CH}(\text{CH}_2)$ -CO), 1.54 (m, 2H, PO- $\text{CH}_2$ - $\text{CH}_2$ ), 1.34 (m, 2H, PO- $\text{CH}_2$ - $\text{CH}_2$ - $\text{CH}_2$ - $\text{CH}_3$ ), 1.24 (m, 3H, N- $\text{CH}_2$ - $\text{CH}_3$ ), 1.05 (m, 3H, N- $\text{CH}_2$ - $\text{CH}_3$ ), 0.89 (m, 3H, PO- $\text{CH}_2$ - $\text{CH}_2$ - $\text{CH}_2$ - $\text{CH}_3$ )

Yield: 82%

### Compound 7b1

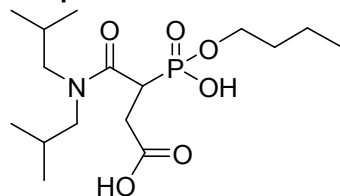

$^{31}\text{P}$  NMR ( $\text{CDCl}_3$ , 162 MHz)  $\delta$  (ppm): 24.5

$^1\text{H}$  NMR ( $\text{CDCl}_3$ , 400 MHz,  $25^\circ\text{C}$ )  $\delta$  (ppm): 4.11-4.03 (m, 2H, O $\text{CH}_2$ ), 3.65-3.12 (m, 5H, N- $\text{CH}_2$  &  $\text{CH}$ -P), 2.99-2.81 (m, 2H), 2.15-2.00 (m, 2H), 1.61-1.59 (m, 2H), 1.36-1.34 (m, 2H), 0.96-0.84 (m, 15H,  $\text{CH}_3$ )

Yield: 75%

### Compound 7b2

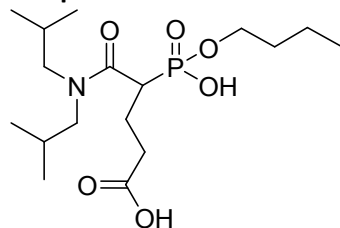

$^{31}\text{P}$  NMR ( $\text{CDCl}_3$ , 162 MHz)  $\delta$  (ppm): 25.25

$^1\text{H}$  NMR ( $\text{CDCl}_3$ , 400 MHz,  $25^\circ\text{C}$ )  $\delta$  (ppm): 4.12-4.07 (q, 2H, O- $\text{CH}_2$ - $\text{CH}_2$ - $\text{CH}_2$ ), 4.02-4.01 (m, 2H), 3.23-3.15 (m, 4H, N- $\text{CH}_2$ ), 2.64 (m, 1H), 2.38 (m, 1H), 2.22 (m, 2H,  $\text{CH}(\text{CH}_3)_2$ ), 1.97 (m, 2H,  $\text{CH}$ - $\text{CH}_2$ ), 1.62-1.58 (m, 2H), 1.38-1.32 (m, 2H), 1.24-1.21 (t, 2H), 0.92-0.85 (m, 15H,  $\text{CH}_3$ )

$^{13}\text{C}$  NMR ( $\text{CDCl}_3$ , 100 MHz,  $25^\circ\text{C}$ )  $\delta$  (ppm): 173.1 (C=O), 65.6 ( $\text{CH}_2$ ), 60.7 ( $\text{CH}_2$ ), 56.6 ( $\text{CH}_2$ ), 55.3 ( $\text{CH}_2$ ), 40.9 (CH), 32.7 ( $\text{CH}_2$ ), 31.9 ( $\text{CH}_2$ ), 28.6 (CH), 26.9 ( $\text{CH}_3$ ), 23.8 ( $\text{CH}_2$ ), 20.3 ( $\text{CH}_3$ ), 18.9 ( $\text{CH}_2$ ), 14.4 ( $\text{CH}_3$ ), 13.8 ( $\text{CH}_3$ )

Yield: 87%

### Compound 7b3

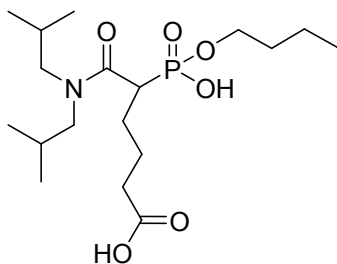

$^{31}\text{P}$  NMR (CDCl<sub>3</sub>, 162 MHz)  $\delta$  (ppm): 25.4

$^1\text{H}$  NMR (CDCl<sub>3</sub>, 400 MHz, 25°C)  $\delta$  (ppm): 4.09-4.03 (m, 3H), 3.23-3.04 (m, 10H), 2.29 (m, 2H), 1.97 (m, 4H, N-CH<sub>2</sub>-CH et CO-CH<sub>2</sub>), 1.62-1.58 (m, 4H, CH-CH<sub>2</sub> et O-CH<sub>2</sub>-CH<sub>2</sub>), 1.38-1.34 (m, 3H), 1.23 (t, 2H), 0.93-0.88 (m, 15H, CH<sub>3</sub>)

Yield: 99%

#### Compound 7b4

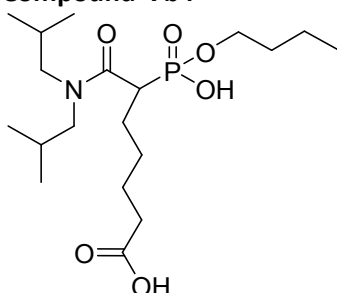

$^{31}\text{P}$  NMR (CDCl<sub>3</sub>, 162 MHz)  $\delta$  (ppm): 26.1

$^1\text{H}$  NMR (CDCl<sub>3</sub>, 400 MHz, 25°C)  $\delta$  (ppm): 6.36 (s, OH), 4.11-4.05 (m, 2H, O-CH<sub>2</sub>), 3.69 (m, 1H, CO-CH), 3.27-3.07 (m, 4H, N-CH<sub>2</sub>), 2.28-1.89 (m, 4H), 1.65-1.57 (m, 3H), 1.39-1.30 (m, 4H), 1.24-1.19 (m, 3H, O-(CH<sub>2</sub>)<sub>2</sub>-CH<sub>3</sub>), 0.92-0.86 (m, 12H, (CH<sub>3</sub>)<sub>2</sub>-N)

Yield: 99%

#### Compound 7c1

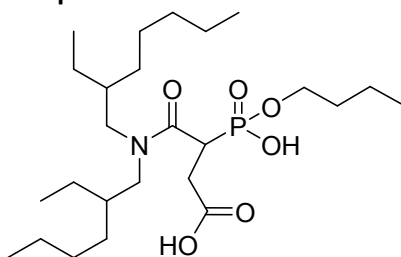

$^{31}\text{P}$  NMR (CDCl<sub>3</sub>, 162 MHz)  $\delta$  (ppm): 23.8

$^1\text{H}$  NMR (CDCl<sub>3</sub>, 400 MHz, 25°C)  $\delta$  (ppm): 4,04-3,98 (m, 2H, O-CH<sub>2</sub>-CH<sub>3</sub>), 3,71 – 3,18 (m, 6H, CH<sub>2</sub>-N & CO-CH<sub>2</sub>), 2,97-2,76 (m, 1H, , CO-CH-P) ; 1,81 – 1,63 (m, 4H, CH-CH<sub>2</sub>-N& PO-CH<sub>2</sub>-Cl-) ; 1,44 – 1,15 (m, 15H, CH<sub>2</sub>& O-CH<sub>2</sub>-CH<sub>3</sub>) ; 0,98 – 0,75 (m, 12H, CH<sub>3</sub>).

### General procedure for the synthesis of compounds 8n

Compound 6n (2.5 mmol, 1 Eq) is introduced into a 50 mL round bottom flask dried under N<sub>2</sub>, with 10 mL of ethanol, 10ml H<sub>2</sub>O and potassium carbonate (5 mmol, 2 Eq). The mixture is stirred overnight. The mixture is diluted with 10 mL of ethanol and acidified with 14M HCl to reach pH=1. The residue was concentrated under reduced pressure, dissolved into dichloromethane, dried with MgSO<sub>4</sub>, filtered and re-evaporated to yield the desired compound.

### Compound 8c1

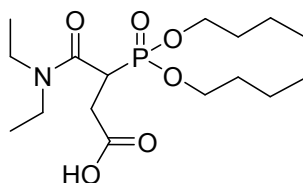

<sup>31</sup>P NMR (CDCl<sub>3</sub>, 162 MHz)  $\delta$  (ppm): 24.7

<sup>1</sup>H NMR (CDCl<sub>3</sub>, 400 MHz, 25°C)  $\delta$  (ppm): 4.07 (m, 4H, POCH<sub>2</sub>), 3.78-3.57 (m, 3H, N-CH<sub>2</sub>), 3.52-3.01 (m, 3H, CH<sub>2</sub>-CO & N-CH<sub>2</sub>), 2.80-2.76 (m, 1H, P-CH(CH<sub>2</sub>)-CO), 1.65 (m, 4H, PO-CH<sub>2</sub>-CH<sub>2</sub>), 1.38 (m, 4H, PO-CH<sub>2</sub>-CH<sub>2</sub>-CH<sub>2</sub>-CH<sub>3</sub>), 1.25 (m, 3H, N-CH<sub>2</sub>-CH<sub>3</sub>), 1.11 (m, 3H, N-CH<sub>2</sub>-CH<sub>3</sub>), 0.92 (m, 6H, PO-CH<sub>2</sub>-CH<sub>2</sub>-CH<sub>2</sub>-CH<sub>3</sub>)

Yield: 92%



## Hybrid materials

### Direct silanisation

Following a classical procedure, a round-bottomed flask was charged with silica powder (6 g), toluene (80 mL) and siloxane. To calculate the quantity of APTES needed, an overestimate was made that the silica materials held five silanols per square nanometre; then, accounting for the specific surface areas of the different materials, 1.2 equivalents of siloxane grafted in T3 mode (viz. with three linked silanols per molecule) were then added. The mixture was stirred vigorously and refluxed at 90 °C for 24 h under nitrogen. The resulting materials were washed overnight by Soxhlet extraction with ethanol, and dried at 80 °C.

NH<sub>2</sub>@silica      siloxane used: APTES (Aldrich)  
PO@silica        siloxane used (2-diethylphosphatoethyl)triethoxysilane (SpecificPolymers)

### Peptide coupling

In a classical approach, a roundbottomed flask was charged under nitrogen with NH<sub>2</sub>@Silica (3 g, 1 eq.), dicyclohexylcarbodiimide (2 eq.), N-hydroxybenzotriazole (2 eq.), diisopropylethylamine (2.5 eq.), Ligand (1,5 eq.) and anhydrous tetrahydrofuran (60 mL), provided that one equivalent represents the amount of primary amine groups previously determined by TGA. The solution was stirred at room temperature for 48 h and then filtered. The resulting material was washed overnight by Soxhlet extraction with a tetrahydrofuran–dichloromethane mixture, and dried overnight.

Amd@silica      ligand used: AcOH (Fluka)  
APo@silica      ligand used: APo(OEt)<sub>2</sub> – APo(OEt-1H)  
DiaPO@silica) ligand used DiAPo (see below)

| Grafted DiAPo    | Precursor used               |
|------------------|------------------------------|
| A                | 4c                           |
| B                | 7c                           |
| C                | 4a                           |
| D or (OBU-1H)    | 7a n                         |
| E                | 7b n                         |
| OBU <sub>2</sub> | 8                            |
| 2H               | 8 + post grafting hydrolysis |

### Post grafting hydrolysis

In a round-bottomed flask was charged under nitrogen starting material (2g), TriMethylSilaneBromure in excess (TMSBr from Aldrich, 1,4 ml) and acetonitrile 20 mL). The mixture was heated under stirring (50 °C, 18h, under Nitrogen or Argon). The resulting material was washed with water, refluxed for 12 hours and then dried under vacuum at 100 °C to give the desired material.

Po-2H@Davisil60      starting material: Po@silica  
DiAPo-2H@silica      starting material: DiAPo-OBU<sub>2</sub>@silica

## Kinetics

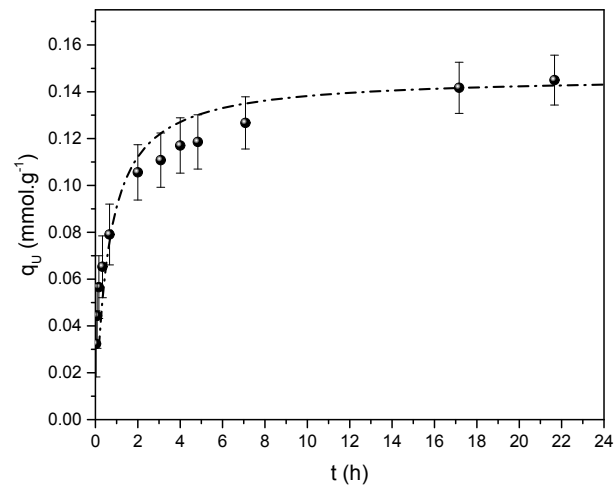

Fig. S1: kinetics of extraction for DiAPo(D)@Davisil60 : experimental points and pseudo-second order fit (dotted line)

## NMR spectra

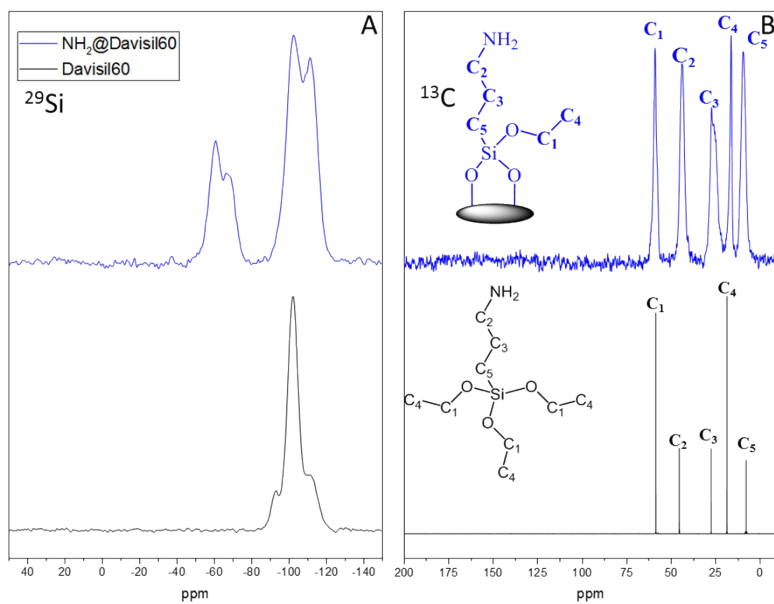

Figure S2 : <sup>13</sup>C and <sup>29</sup>Si solid state NMR of functionalization of Davisil with amino groups (APTES)

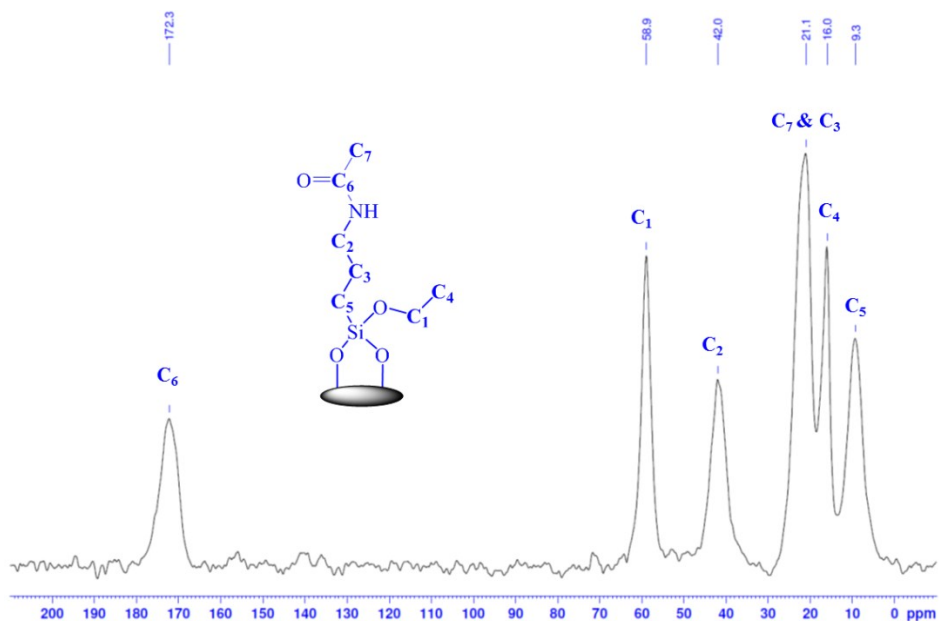

Figure S3 : functionalization of Davisil with amido groups (Amd)

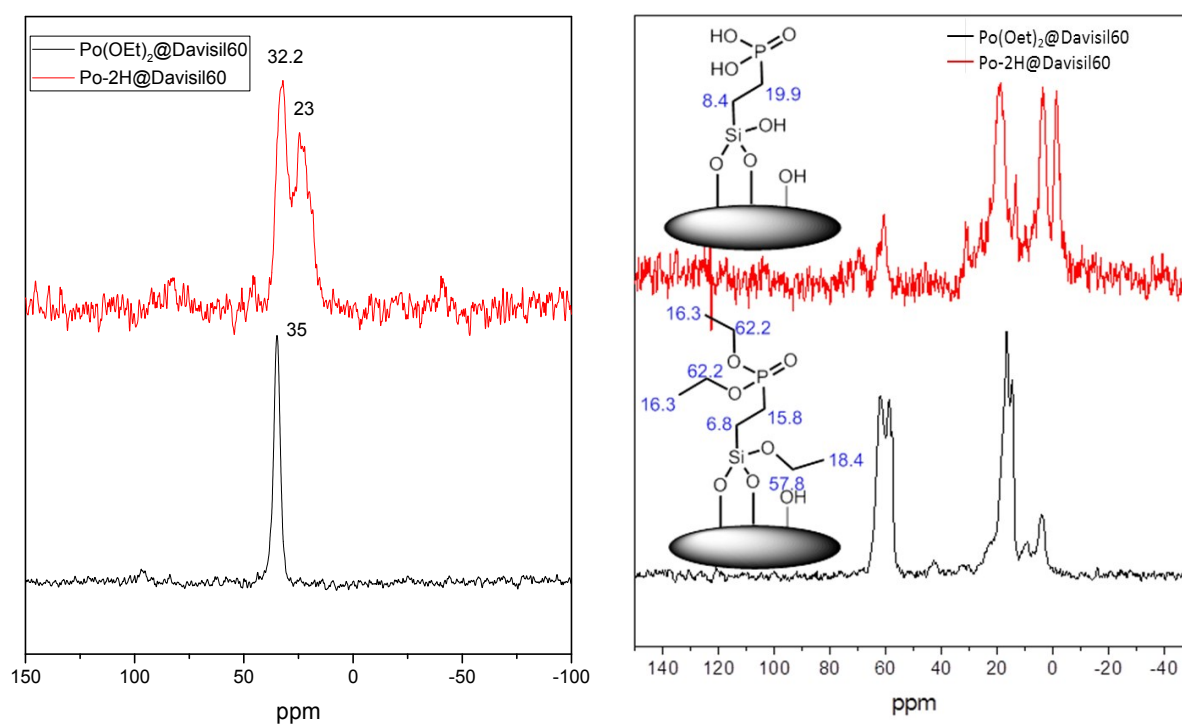

Figure S4 : functionalization of Davisil with mono-phosphonate based functions (Po)

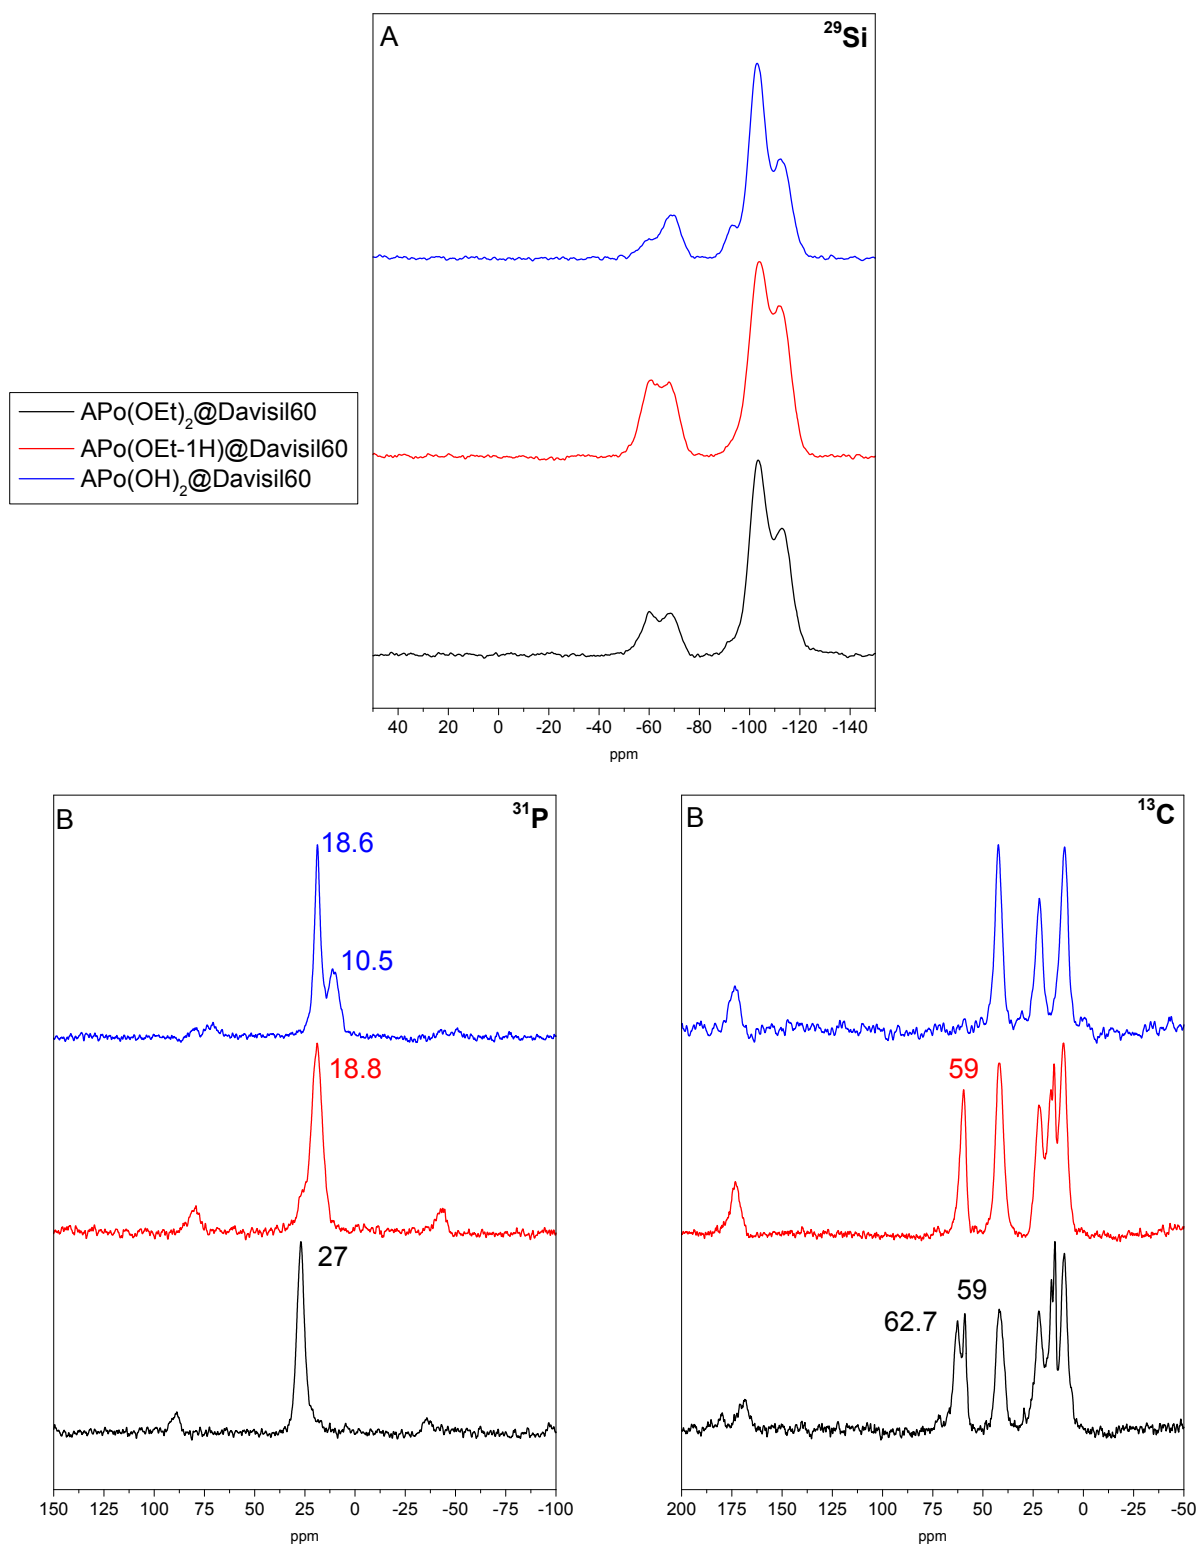

Figure S5 : functionalization of Davisil with amidophosphonates groups (APo)

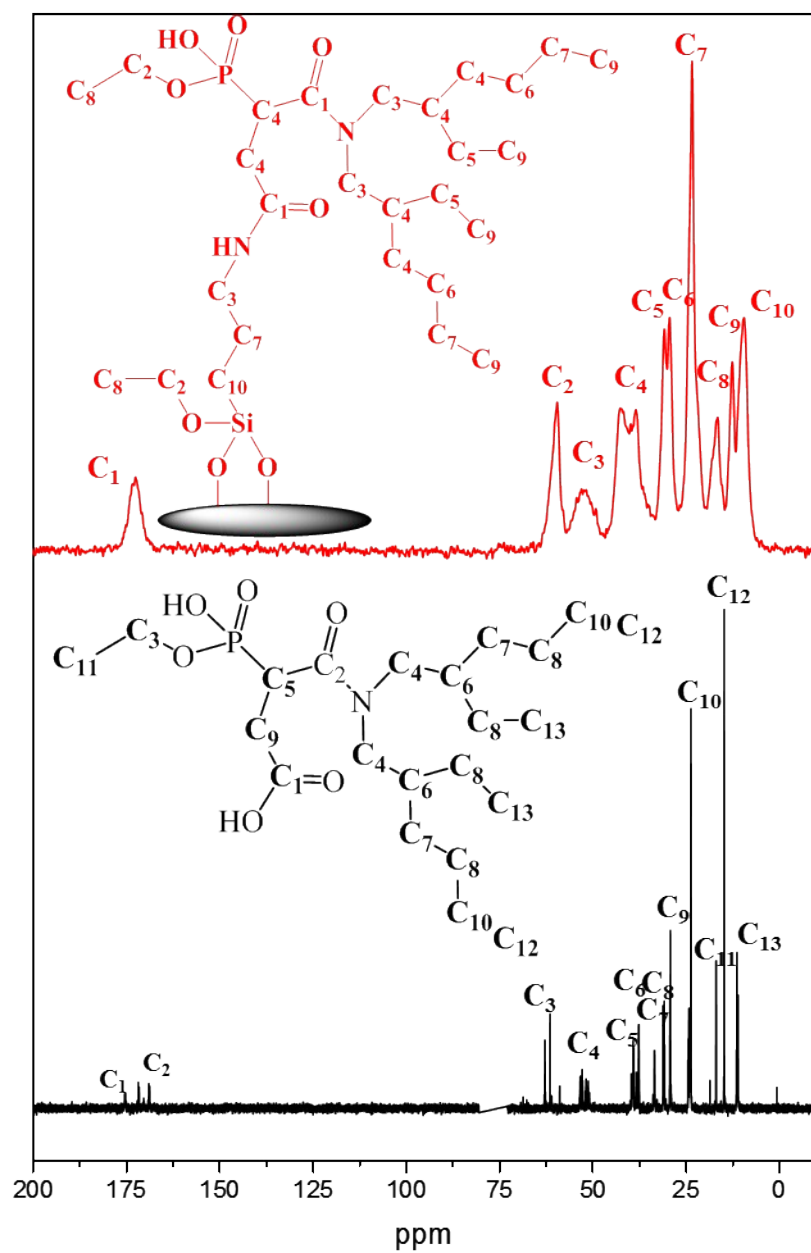

Figure S6 : functionalization of Davisil with di amido phosphonates groups (DiAPo)

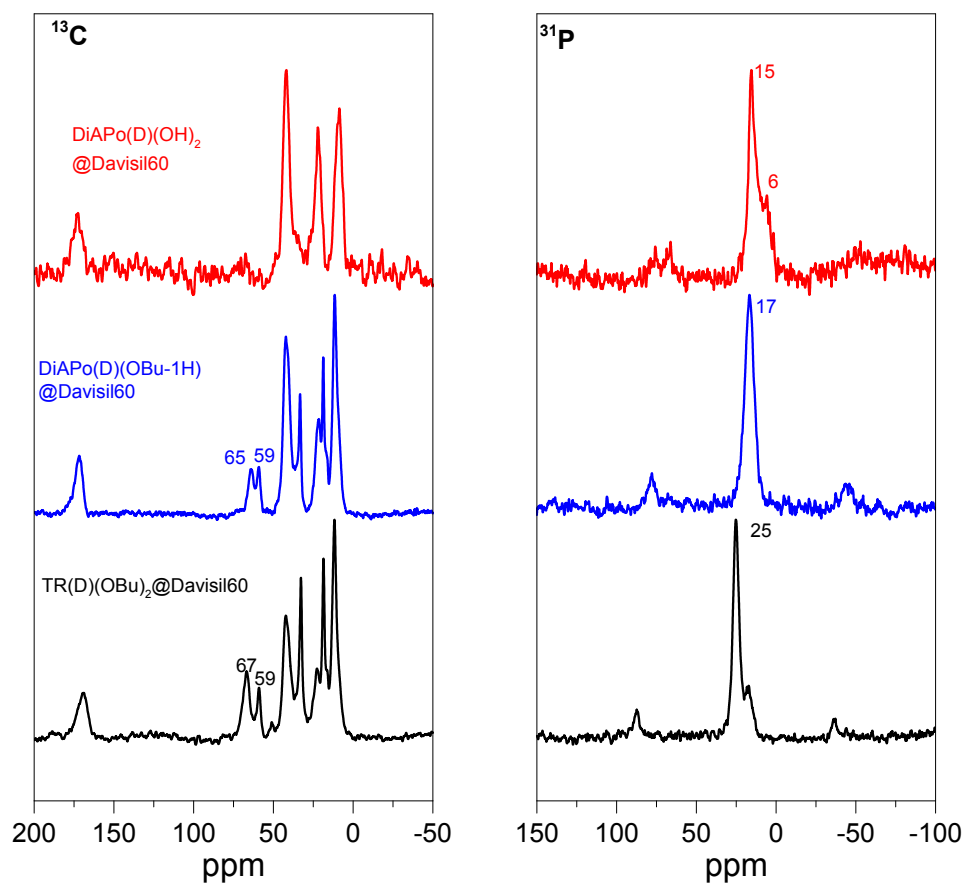

Figure S7 : functionalization of Davisil with di amido phosphonates groups (DiAPo (D))

## IR spectra

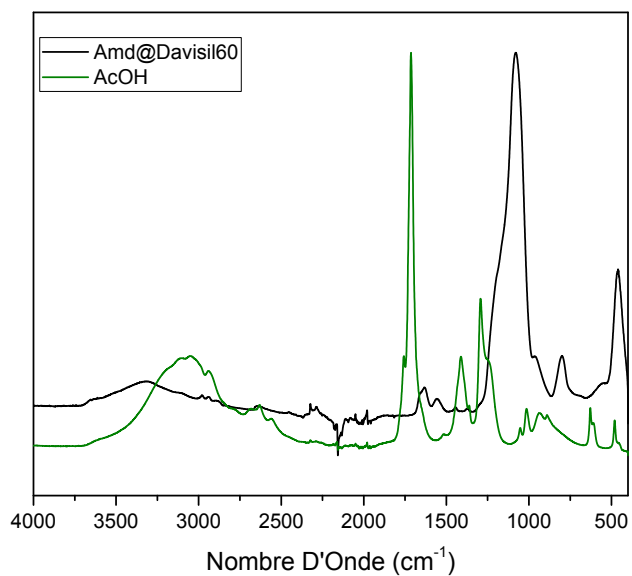

Figure S8 : IR spectra of Amd@Davisil60 (black) and acetic acid (green).

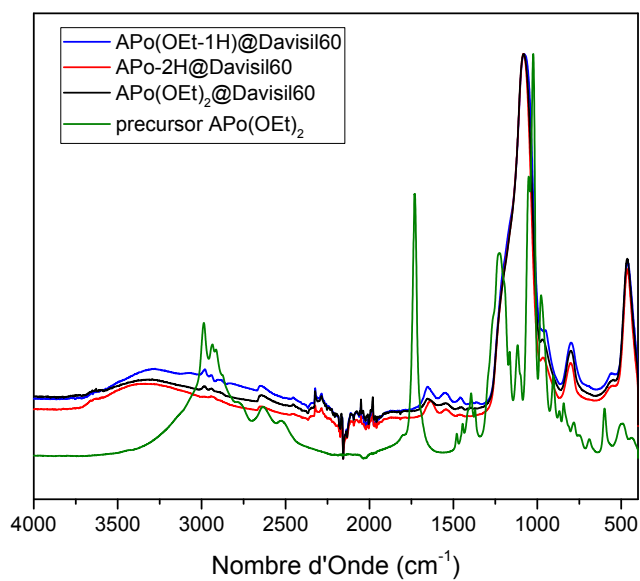

Figure S9 : IR spectra of precursor APo(OEt)<sub>2</sub> (green); APo(OEt)<sub>2</sub>@Davisil60 (black); APo-2H@Davisil60 (red); APo(OEt-1H)@Davisil60 (blue)
